# Supplementary material
Source: Springer Nature journal article supplement (https://www.springermedizin.de/resource/supplementary/13024_2011_199_MOESM6_ESM.pdf/9643654)

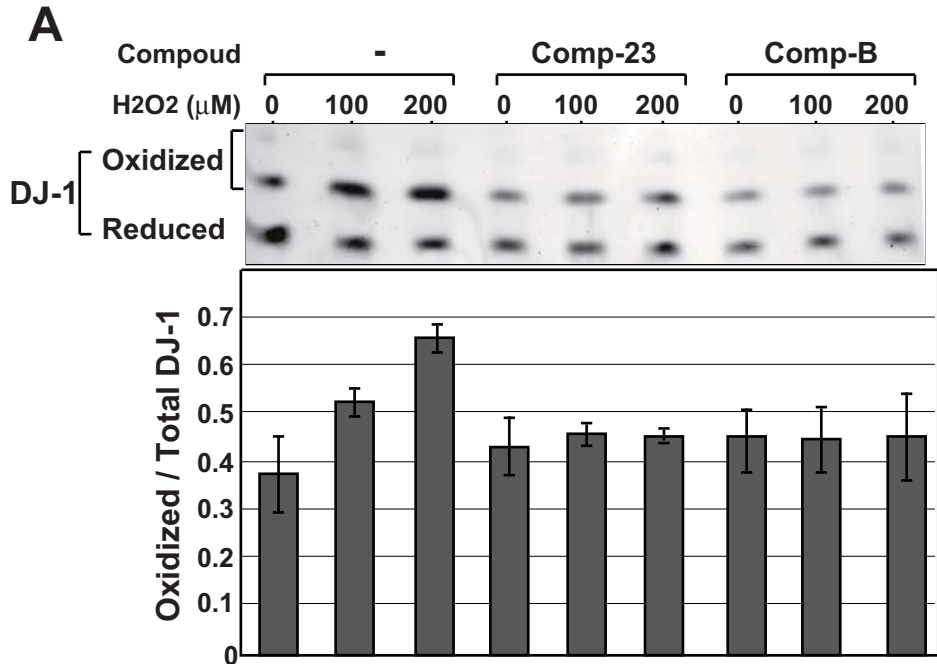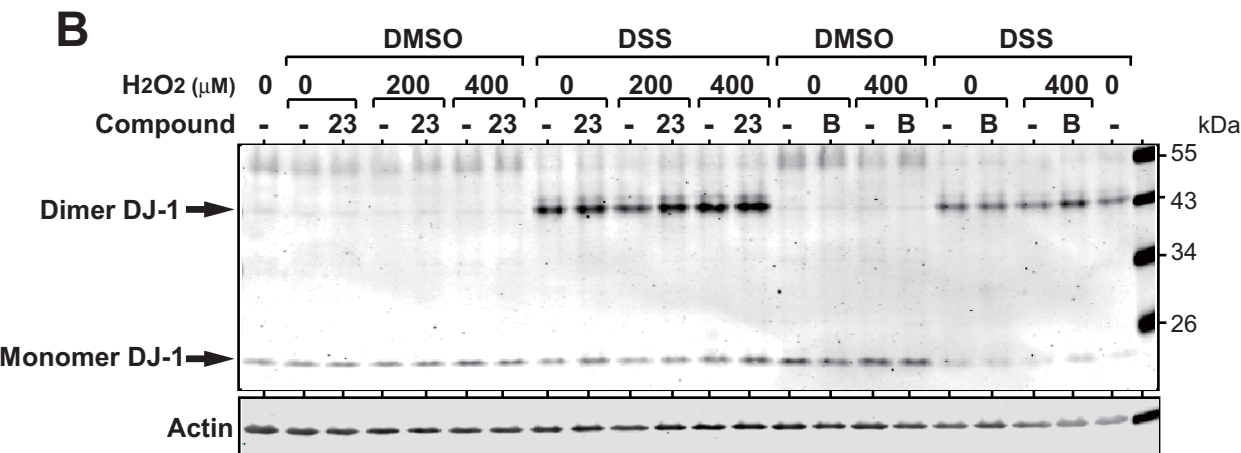

Supplement: MOESM6 [file 9643654]
